# Supplementary material for: Functionalized protein nanoemulsions by incorporation of chemically modified BSA
Source: Royal Society of Chemistry journal article supplement (doi:10.1039/c4ra13802c), 2014-12-10
Supplement: c4ra13802c1.pdf [file c4ra13802c1.pdf]

## Supplementary Information

Table S1 Characterization of BSA-FA/drugs conjugates.

| Conjugates | Moles of FA/drugs per 1 mole of BSA |
|------------|-------------------------------------|
| BSA-FA     | 35                                  |
| BSA-MTX    | 11                                  |
| BSA-VCM    | 0.28                                |

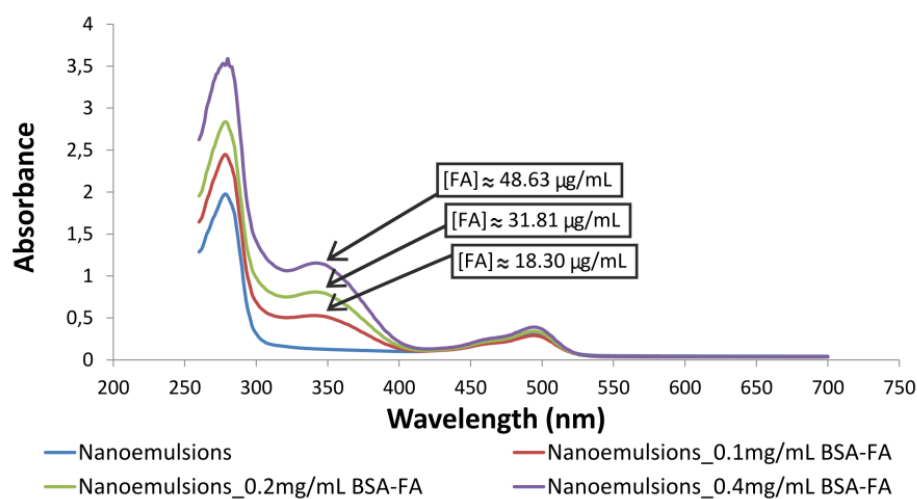

**Fig. S1** Absorbance spectra of aqueous phase of samples prepared with different concentrations of BSA-FA conjugate.
